# Supplementary material for: Global Stillbirth Policy Review – Outcomes And Implications Ahead of the 2030 Sustainable Development Goal Agenda
Source: PubMed Central journal article supplement (PMC10590256; doi:10.34172/ijhpm.2023.7391), 2023-08-15
Supplement: ijhpm-12-7391-s001.pdf [file ijhpm-12-7391-s001.pdf]

**Article title:** Global Stillbirth Policy Review – Outcomes And Implications Ahead of the 2030 Sustainable Development Goal Agenda

**Journal name:** International Journal of Health Policy and Management (IJHPM)

Authors’ information: Nana A. Mensah Abrampah<sup>1\*</sup>, Yemisrach B. Okwaraji<sup>2</sup>, Danzhen You<sup>3</sup>, Lucia Hug<sup>3</sup>, Salome Maswime<sup>4</sup>, Caroline Pule<sup>4</sup>, Hannah Blencowe<sup>2</sup>, Debra Jackson<sup>2,5</sup>

**\*Correspondence to:** Nana A. Mensah Abrampah, Email: [nana.mensah-abrampah@lshtm.ac.uk](mailto:nana.mensah-abrampah@lshtm.ac.uk)

**Citation:** Mensah Abrampah NA, Okwaraji YB, You D, et al. Global stillbirth policy review – outcomes and implications ahead of the 2030 Sustainable Development Goal agenda. Int J Health Policy Manag. 2023;12:7391. doi:[10.34172/ijhpm.2023.7391](https://doi.org/10.34172/ijhpm.2023.7391)

### Supplementary file 1

**Table S1. Rationale for excluding eight (out of the 24 questions) questions**

|   | ID     | Thematic Area                                     | RMNCAH Policy Question                                                                                                      | Rationale for excluding                                                 |
|---|--------|---------------------------------------------------|-----------------------------------------------------------------------------------------------------------------------------|-------------------------------------------------------------------------|
| 1 | MN_23  | Childbirth Policy                                 | Does the country have a national policy/guideline on the right of every woman to have access to skilled care at childbirth? | Focused question on human resources for stillbirths                     |
| 2 | CC_57  | Surveys and health management information systems | Does your national health information system (HIS) collect and report on the following data?                                | Requires verification in national health management information systems |
|   | CC_57e |                                                   | Number or rates of live births                                                                                              |                                                                         |
|   | CC_57f |                                                   | Number or rates of stillbirths                                                                                              |                                                                         |
|   | CC_57g |                                                   | Number or rates of newborn deaths?                                                                                          |                                                                         |
|   | CC_57h |                                                   | Causes of newborn death?                                                                                                    |                                                                         |
| 3 | MN_68  | Human Resources Policy                            | Are there national policies/guidelines that set forth a competency framework for maternal and/or newborn health care?       | Focused question on human resources for stillbirths                     |

|   |       |                        |                                                                                                                                                                     |                                                     |
|---|-------|------------------------|---------------------------------------------------------------------------------------------------------------------------------------------------------------------|-----------------------------------------------------|
| 4 | MN_69 | Human Resources Policy | Is there a continuous professional education system in place for primary health-care clinicians and/or nurses to receive maternal and/or newborn-specific training? | Focused question on human resources for stillbirths |
| 5 | MN_70 | Human Resources Policy | Is there a national policy/guideline on education of midwifery care providers based on International Confederation of Midwives (ICM) competencies?                  | Focused question on human resources for stillbirths |
| 6 | MN_71 | Human Resources Policy | Is there a national policy/guideline on regulation of midwifery care providers (doctors, nurses, and midwives) based on ICM competencies?                           | Focused question on human resources for stillbirths |
| 7 | MN_88 | Maternal deaths        | How often does the national panel (committee) meet?                                                                                                                 | Frequency of death review panel meetings            |
|   |       |                        | Monthly                                                                                                                                                             |                                                     |
|   |       |                        | Quarterly                                                                                                                                                           |                                                     |
|   |       |                        | Semi-annually                                                                                                                                                       |                                                     |
|   |       |                        | Annually                                                                                                                                                            |                                                     |
|   |       |                        | Unknown                                                                                                                                                             |                                                     |
| 8 | MN_89 | Maternal deaths        | When did the panel last meet?                                                                                                                                       |                                                     |

## Table S2. Guidance to reviewing national documents, original and adjusted questions

- **Step 1:** Open the main folder with all available documents.
- **Step 2:** Review the excel sheet named *Metadata\_WHO\_SRMNCAH\_PolicySurvey\_2018\_2019\_data.xlsx* with the original survey responses provided by countries to the selected questions. This is the secondary data information collected by WHO.
- **Step 3:** Open the primary data collection sheet with the adjusted questions (see below table) and familiarize yourself. This sheet is the one needing completion.
- **Step 4:** Open the link for the national documents to be reviewed. The national documents are grouped by WHO regional office categorization and then country listing.
- **Step 5:** For the adjusted questions in the primary data collection sheet, for each country, review all the national documents that are in English with the associated search words: still, stillbirth, still birth, fetal, foetus, fetus, foetal. The review of national documents will be conducted using the associated search terms. For example, once a national document is open, use the command: ctrl + f (for windows) or command + f (for Mac) to search the document. Further definitions are provided in table S4.
- **Step 6:** Record the response for the primary question, following review of national level documents. Use the guidance provided before recording the response.
  - If stillbirth is identified as addressed per question in the national document, include 1 for yes in the excel sheet labelled *adjusted\_primary\_data*
  - If stillbirth is not specifically mentioned in national documents, enter 0 for no in the *adjusted\_primary\_data* sheet.
  - If no national documents is available, place 99 in the cell.
  - If the national document is not in English, place 2 in the cell.
- **Step 7:** Under the folder “Documents relating to stillbirth specifically” add any national policy/plan/guideline/strategy that stillbirth is mentioned. Note: the folder is grouped by region.

|                                | ID     | Thematic Area                            | RMNCAH Policy Survey Original Question                                                                                                        | This study adjusted question                                                                                            | Associated study objective |
|--------------------------------|--------|------------------------------------------|-----------------------------------------------------------------------------------------------------------------------------------------------|-------------------------------------------------------------------------------------------------------------------------|----------------------------|
| <b>Module 1: Cross-cutting</b> |        |                                          |                                                                                                                                               |                                                                                                                         |                            |
| 1                              | CC_11b | Introductory                             | Has your country developed a national target for any of the following indicators?<br>[Under-five mortality rate]                              | Not applicable                                                                                                          | Objective 1                |
|                                |        |                                          | Target [ per 1000 live births]                                                                                                                |                                                                                                                         |                            |
|                                | CC_11c | Introductory                             | Has your country developed a national target for any of the following indicators?<br>[Neonatal mortality rate]                                | Not applicable                                                                                                          | Objective 1                |
|                                |        |                                          | Target [ per 1000 live births]                                                                                                                |                                                                                                                         |                            |
| 1                              | CC_11d | Introductory                             | Has your country developed a national target for any of the following indicators?<br><br>[Stillbirth rate]                                    | Not applicable                                                                                                          | Objective 1                |
|                                |        |                                          | Target [ per 1000 live births]                                                                                                                |                                                                                                                         |                            |
| 2                              | CC_51  | Policies on death registration processes | Is there a national policy/law that requires every death to be registered?                                                                    | Is there a national policy/law that requires every death including [stillbirth or fetal death] to be registered?        | Objective 6                |
| 3                              | CC_52  | Policies on death registration processes | Does the policy/law require cause of death registration to be in line with ICD-10?                                                            | Does the policy/law require cause of death registration [for stillbirth or fetal death] to be in line with ICD-10?      | Objective 6                |
| 4                              | CC_53  | Policies on death registration processes | Is there a policy/law that requires routine audit and/or review of death certification for maternal, perinatal, neonatal and/or child deaths? | Is there a policy/law that requires routine audit and/or review of death certification for [stillbirth or fetal death]? | Objective 6                |
| 5                              | CC_54  | Policies on death registration processes | Does the policy/law that requires routine audit and/or review of death certification do any of the following?                                 | Not applicable                                                                                                          | Objective 4<br>Objective 6 |

|   |        |                                                   |                                                                                                                                                                                                                                                                                                                                                         |                                                                                                                                                                                                                 |             |
|---|--------|---------------------------------------------------|---------------------------------------------------------------------------------------------------------------------------------------------------------------------------------------------------------------------------------------------------------------------------------------------------------------------------------------------------------|-----------------------------------------------------------------------------------------------------------------------------------------------------------------------------------------------------------------|-------------|
|   | CC_54a |                                                   | Require the issuance of medical certificates of cause of death?                                                                                                                                                                                                                                                                                         | Require the issuance of medical certificates of cause of death for [stillbirth or fetal death]?                                                                                                                 |             |
|   | CC_54b |                                                   | Recommend training health workers in filling out death certificates using the International Classification of Diseases (ICD)?                                                                                                                                                                                                                           | Recommend training health workers in filling out death certificate using the ICD-classification for stillbirth?                                                                                                 |             |
|   | CC_54c |                                                   | Require death data recorded at health facilities or by community health workers (CHWs) to be provided to the national statistics office, civil registration system, or equivalent bodies?                                                                                                                                                               | Require death data recorded on [stillbirth or fetal death] at health facilities or by community health workers to be provided to the national statistics office, civil registration system or equivalent bodies |             |
|   | CC_54d |                                                   | Require sharing individual death records within the health system and between central and district/regional levels?                                                                                                                                                                                                                                     | Require sharing individual death record on [stillbirth or fetal death] within the health system and between central and district/regional levels?                                                               |             |
|   | CC_54e |                                                   | Recommend verbal autopsy on community deaths for determining cause of death?                                                                                                                                                                                                                                                                            | Recommend or use verbal autopsy on [stillbirths or fetal death] at the community level for determining cause of deaths?                                                                                         |             |
| 6 | CC_59  | Surveys and health management information systems | <p>What are the three most commonly used data sources to compare maternal, newborn, child, and adolescent mortality rates in your country to mortality rates in other countries?</p> <p>National Health Statistics<br/>Civil Registration and Vital Statistics<br/>Population-based survey<br/>WHO website or reports<br/>UNICEF website or reports</p> | Not applicable                                                                                                                                                                                                  | Objective 3 |

|                                       |       |                                   |                                                                                                                                                                                                                                                                                                                                                                                                |                |             |
|---------------------------------------|-------|-----------------------------------|------------------------------------------------------------------------------------------------------------------------------------------------------------------------------------------------------------------------------------------------------------------------------------------------------------------------------------------------------------------------------------------------|----------------|-------------|
|                                       |       |                                   | UN SDG website or reports<br>WB website or reports<br>UNDP website or reports<br>UNFPA website or reports<br>Institute for Health Metrics Global Burden of Disease<br>Countdown to 2030 website or reports<br>Other                                                                                                                                                                            |                |             |
| Module 3: Maternal and Newborn Health |       |                                   |                                                                                                                                                                                                                                                                                                                                                                                                |                |             |
| 7                                     | MN_75 | Essential Medicines and Equipment | Are there national policies/guidelines on essential medicines and equipment?                                                                                                                                                                                                                                                                                                                   | Not applicable | Objective 4 |
| 8                                     | MN_77 | Essential Medicines and Equipment | Are any of the following supplies and equipment included in the national list of commodities indicated for use of pregnancy, childbirth and postpartum care?<br><br>Obstetric ultrasound machine?<br>Self-inflating bag (newborn size) with neonatal and paediatric masks of different size and valve?<br>Oxygen supply?<br>Pulse oximeter?<br>Blood and blood products?<br>Vacuum aspiration? | Not applicable | Objective 4 |
| 9                                     | MN_84 | Maternal deaths                   | Is there a national panel (committee) to review maternal deaths in place?                                                                                                                                                                                                                                                                                                                      | Not applicable | Objective 2 |
| 10                                    | MN_87 | Maternal deaths                   | Does this national panel (committee) include stillbirth or neonatal death reviews? [Y/N]                                                                                                                                                                                                                                                                                                       | Not applicable | Objective 2 |
| 11                                    | MN_90 | Maternal deaths                   | Is/are there a subnational panel(s) (committee(s)) to review maternal deaths in place?                                                                                                                                                                                                                                                                                                         | Not applicable | Objective 2 |

|    |       |                |                                                                                                                                                                                                                |                |             |
|----|-------|----------------|----------------------------------------------------------------------------------------------------------------------------------------------------------------------------------------------------------------|----------------|-------------|
| 12 | MN_92 | Stillbirths    | Is there a national policy/guideline/law that requires stillbirths (fresh or macerated) to be reviewed?                                                                                                        | Not applicable | Objective 2 |
| 13 | MN_93 | Stillbirths    | Is there a facility stillbirth review process in place?                                                                                                                                                        | Not applicable | Objective 2 |
| 14 | MN_95 | Neonatal death | Is there a national policy/guideline/law that requires neonatal deaths (0-28 days) to be reviewed?                                                                                                             | Not applicable | Objective 2 |
| 15 | MN_96 | Neonatal death | Is there a national policy requiring classification of the causes of stillbirths and neonatal deaths according to the ICD-PM (WHO application of ICD-10 to deaths during the perinatal period) classification? | Not applicable | Objective 2 |
| 16 | MN_97 | Neonatal death | Is there a facility neonatal death review process in place?                                                                                                                                                    | Not applicable | Objective 2 |

**Table S3 – 885 documents submitted in English by 66 countries for review**

| WHO Region            | Arabic | Chinese | English | French | Not Official Language | Russian | Spanish | Grand Total |
|-----------------------|--------|---------|---------|--------|-----------------------|---------|---------|-------------|
| Europe                |        |         | 98      | 30     | 689                   | 50      | 15      | 882         |
| Americas              |        |         | 77      | 14     | 52                    |         | 464     | 607         |
| Africa                |        |         | 211     | 205    | 47                    |         |         | 463         |
| Eastern Mediterranean | 91     |         | 175     | 32     |                       |         |         | 298         |
| Western Pacific       |        | 24      | 174     |        | 99                    |         |         | 297         |
| South-East Asia       |        |         | 150     |        | 120                   |         |         | 270         |
| Grand Total           | 91     | 24      | 885     | 281    | 1007                  | 50      | 479     | 2817        |



**Table S4. Operational definitions**

| <b>Classification</b>  | <b>Description</b>                                                                                                                                                                                                                                                                                                                                                                                                                                                                                  |
|------------------------|-----------------------------------------------------------------------------------------------------------------------------------------------------------------------------------------------------------------------------------------------------------------------------------------------------------------------------------------------------------------------------------------------------------------------------------------------------------------------------------------------------|
| Fetal death            | <i>Fetal death is intrauterine death prior to the complete expulsion or extraction from a woman of a fetus irrespective of the duration of pregnancy.</i>                                                                                                                                                                                                                                                                                                                                           |
| Stillbirth             | <i>Stillbirth is the complete expulsion or extraction from a woman of a fetus following a fetal death at 22 or more completed weeks of gestation; or if gestational age is not available with a birthweight of 500 grams or more.</i>                                                                                                                                                                                                                                                               |
| Antepartum stillbirth  | <i>Complete expulsion or extraction from a woman of a fetus following an antepartum fetal death at 22 or more completed weeks of gestation; or if gestational age is not available with a birthweight of 500 grams or more.</i>                                                                                                                                                                                                                                                                     |
| Intrapartum stillbirth | <i>Complete expulsion or extraction from a woman of a fetus following an intrapartum fetal death at 22 or more completed weeks of gestation; or if gestational age is not available with a birthweight of 500 grams or more.</i>                                                                                                                                                                                                                                                                    |
| Fresh stillbirth       | <i>Complete expulsion or extraction from a woman of a fetus following a fetal death at 22 or more completed weeks of gestation; or if gestational age is not available with a birthweight of 500g or more with skin showing no signs of maceration (fresh appearance).</i>                                                                                                                                                                                                                          |
| Macerated stillbirth   | <i>Complete expulsion or extraction from a woman of a fetus following a fetal death at 22 or more completed weeks of gestation; or if gestational age is not available with a birthweight of 500g or more with skin showing signs of maceration.<br/>Maceration describes the degenerative changes that occur in stillbirths retained in the uterus after death, and the earliest signs are in the form of discoloration and peeling of the skin, leaving regions of raw tissue [<sup>1</sup>].</i> |

---

<sup>1</sup> World Health Organization, *ICD-11 for Mortality and Morbidity Statistics 2020*: Geneva
